# Supplementary material
Source: publisher figshare collection journal article supplement (https://rs.figshare.com/ndownloader/files/13646435)
Supplement: Supplementary file [file 13646435]

## A-Amylase immobilization on amidoximated acrylic microfibers activated by cyanuric chloride

Yaaser Q. Almulaiky<sup>1,2</sup>, Faisal M. Aqlan<sup>3</sup>, Musab Aldhahri<sup>4,5</sup>, Mohammed Baeshen<sup>6</sup> Tariq Jamal Khan<sup>7</sup>, Khalid A. Khan<sup>8</sup>, Mohamed Afifi<sup>6,9</sup>, Ammar AL-Farga<sup>1</sup>, Mohiuddin Khan Warsi<sup>1</sup>, Mohammed Alkaled<sup>6</sup>, Aisha A.M. Alayafi<sup>6</sup>

<sup>1</sup>Department of Biochemistry, Faculty of Science, University of Jeddah, Jeddah, Saudi Arabia

<sup>2</sup>Chemistry Department, Faculty of Applied Science, Taiz University, Taiz, Yemen

<sup>3</sup>Chemistry Department, Faculty of Science, University of Jeddah, Jeddah, Saudi Arabia

<sup>4</sup>Department of Biochemistry, Faculty of Science, King Abdulaziz University, Jeddah, Saudi Arabia

<sup>5</sup>Center of Nanotechnology, King Abdulaziz University, Jeddah, Saudi Arabia

<sup>6</sup>Department of biology, Faculty of Science, University of Jeddah, Jeddah, Saudi Arabia

<sup>7</sup>Stem Cell P2 Laboratory, The Center for Reproductive Medicine, Shantou University Medical College, Shantou, 515041, People's Republic of China

<sup>8</sup>Chemistry Department, Faculty of Science, King Abdulaziz University, Jeddah, Saudi Arabia

<sup>9</sup>Biochemistry Department, Faculty of Veterinary Medicine, Zagazig University, Egypt

### Supplementary Figure 4

| Number of repeated reaction | Residual activity % | Residual units | OD at 560 nm<br>n/3 |
|-----------------------------|---------------------|----------------|---------------------|
| 1                           | 100                 | 12.6           | 1.380               |
| 2                           | 95                  | 11.97          | 1.311               |
| 3                           | 92                  | 11.59          | 1.2696              |
| 4                           | 84                  | 10.58          | 1.1592              |
| 5                           | 80                  | 10.08          | 1.104               |
| 6                           | 78                  | 9.83           | 1.0764              |
| 7                           | 77                  | 9.69           | 1.0626              |
| 8                           | 77                  | 9.67           | 1.060               |
| 9                           | 72                  | 9.07           | 0.993               |
| 19                          | 72                  | 9.07           | 0.991               |

**Supplementary Figure 4** Reuse of immobilized  $\alpha$ -amylase. Reusability tests of the immobilized  $\alpha$ -amylase were carried out by addition of reaction mixture contained 1ml of 50 mM sodium acetate buffer, pH 5.5, 1ml of starch (1%) and 1cm<sup>2</sup> immobilized enzyme. The reaction stopped

by the addition of 1 ml DNS reagent, followed by incubation in a boiling water bath for 10 min followed by cooling. The absorbance was recorded at 560 nm.
